# Supplementary material
Source: PubMed Central journal article supplement (PMC7684515)
Supplement: jamaneurol-e204300-s003.pdf [file jamaneurol-e204300-s003.pdf]

## Data Sharing Statement

Wainger. Effect of Ezogabine on Cortical and Spinal Motor Neuron Excitability in Amyotrophic Lateral Sclerosis. *JAMA Neurol*. Published November 23, 2020. 10.1001/jamaneurol.2020.4300

### Data

**Data available:** No

### Additional Information

**Explanation for why data not available:** We have released group data on clinicaltrials.gov. We anticipate performing additional analysis of the clinical trial data.
